# Supplementary material
Source: PubMed Central journal article supplement (PMC8082695)
Supplement: NIHMS1589229-supplement-Supplementary_Material.pdf [file NIHMS1589229-supplement-Supplementary_Material.pdf]

## Supplementary Materials for

### **A regenerative peripheral nerve interface allows real-time control of an artificial hand in upper limb amputees**

Philip P. Vu, Alex K. Vaskov, Zachary T. Irwin, Phillip T. Henning, Daniel R. Lueders, Ann T. Laidlaw, Alicia J. Davis, Chrono S. Nu, Deanna H. Gates, R. Brent Gillespie, Stephen W. P. Kemp, Theodore A. Kung, Cynthia A. Chestek\*, Paul S. Cederna\*

\*Corresponding author. Email: cchestek@umich.edu (C.A.C.); cederna@med.umich.edu (P.S.C.)

Published 4 March 2020, *Sci. Transl. Med.* **12**, eaay2857 (2020)  
DOI: 10.1126/scitranslmed.aay2857

#### **The PDF file includes:**

Fig. S1. Electrode implantation for P3 and P4.  
Fig. S2. P3 and P4's RPNI sonograms, motor map, and electrophysiology.  
Fig. S3. Real-time classification of grasping hand postures.  
Fig. S4. Original and simulated decodes during functional tasks.  
Table S1. Details of a subset of muscles missing in each participant and their function.  
Table S2. Quantitative analysis of ultrasound videos for P1.  
Table S3. Calculated movement selection times for several postures between P3 and P4.  
Table S4. Summary of observed RPNI grafts and the electrode type used to record EMG.  
Legends for movies S1 to S12

#### **Other Supplementary Material for this manuscript includes the following:**

(available at [stm.sciencemag.org/cgi/content/full/12/533/eaay2857/DC1](http://stm.sciencemag.org/cgi/content/full/12/533/eaay2857/DC1))

Movie S1 (.mp4 format). Ultrasound video capturing P1's median RPNIs.  
Movie S2 (.mp4 format). Ultrasound video capturing P1's ulnar RPNIs.  
Movie S3 (.mp4 format). Ultrasound video capturing two RPNIs from P2.  
Movie S4 (.mp4 format). P3's real-time discrete control of finger postures.  
Movie S5 (.mp4 format). P4's real-time discrete control of finger postures.  
Movie S6 (.mp4 format). P3 and P4's real-time discrete control of grasping postures.  
Movie S7 (.mp4 format). P3's real-time continuous one DOF control up to 300 days.  
Movie S8 (.mp4 format). P4's real-time continuous one DOF control up to 97 days.  
Movie S9 (.mp4 format). P3 and P4's real-time continuous two DOF thumb control.  
Movie S10 (.mp4 format). P4's real-time continuous two DOF thumb control using surface EMG.

Movie S11 (.mp4 format). P3's real-time continuous two DOF thumb using the LUKE arm.  
Movie S12 (.mp4 format). P3 and P4's real-time continuous control during functional tasks.

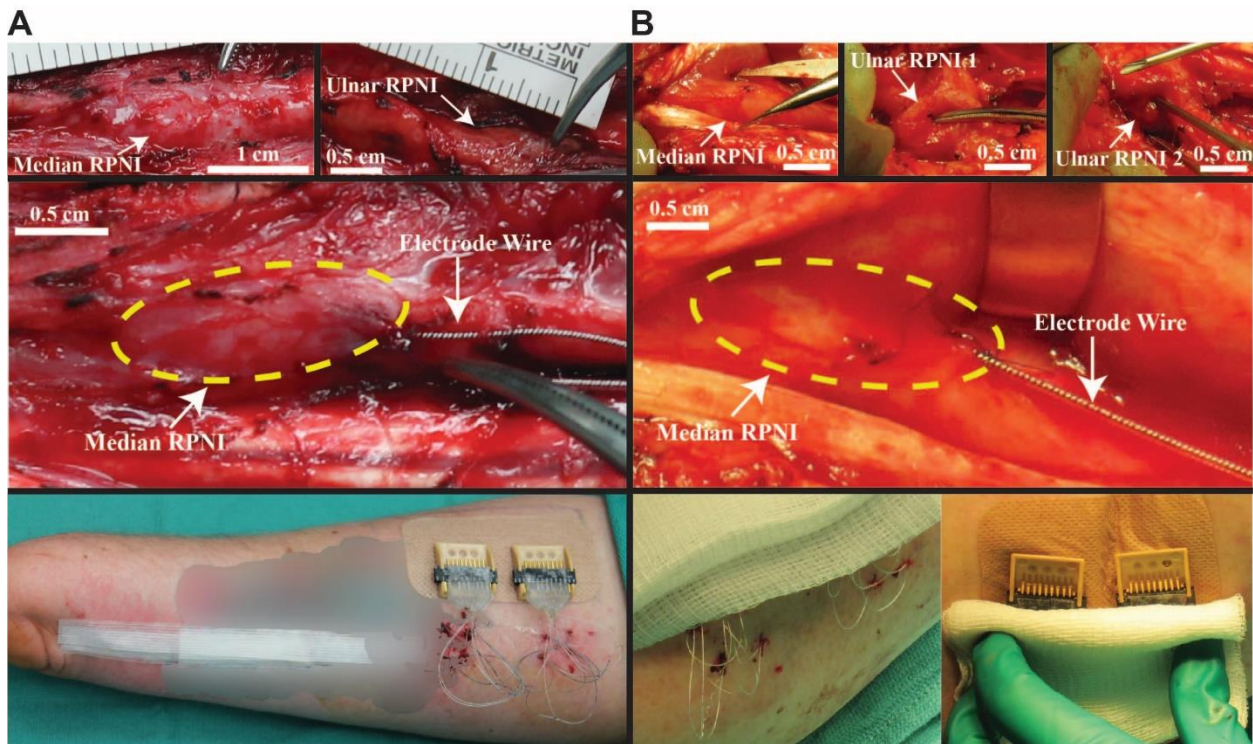

**Fig. S1. Electrode implantation for P3 and P4.** (A) (Top) Surgical photos show the RPNIs three years post-implantation. (Middle) Example of wire insertion into the RPNi muscle graft (dashed line). (Bottom) Final connector setup after all electrodes have been implanted (Partially blurred to protect participant identification). (B) (Top) Surgical photos show the median RPNi, ulnar RPNi 1, and ulnar RPNi 2 twelve months post-implantation. (Middle) Example of wire insertion into the RPNi muscle graft (dashed line). (Bottom) Final connector setup after all electrodes have been implanted.

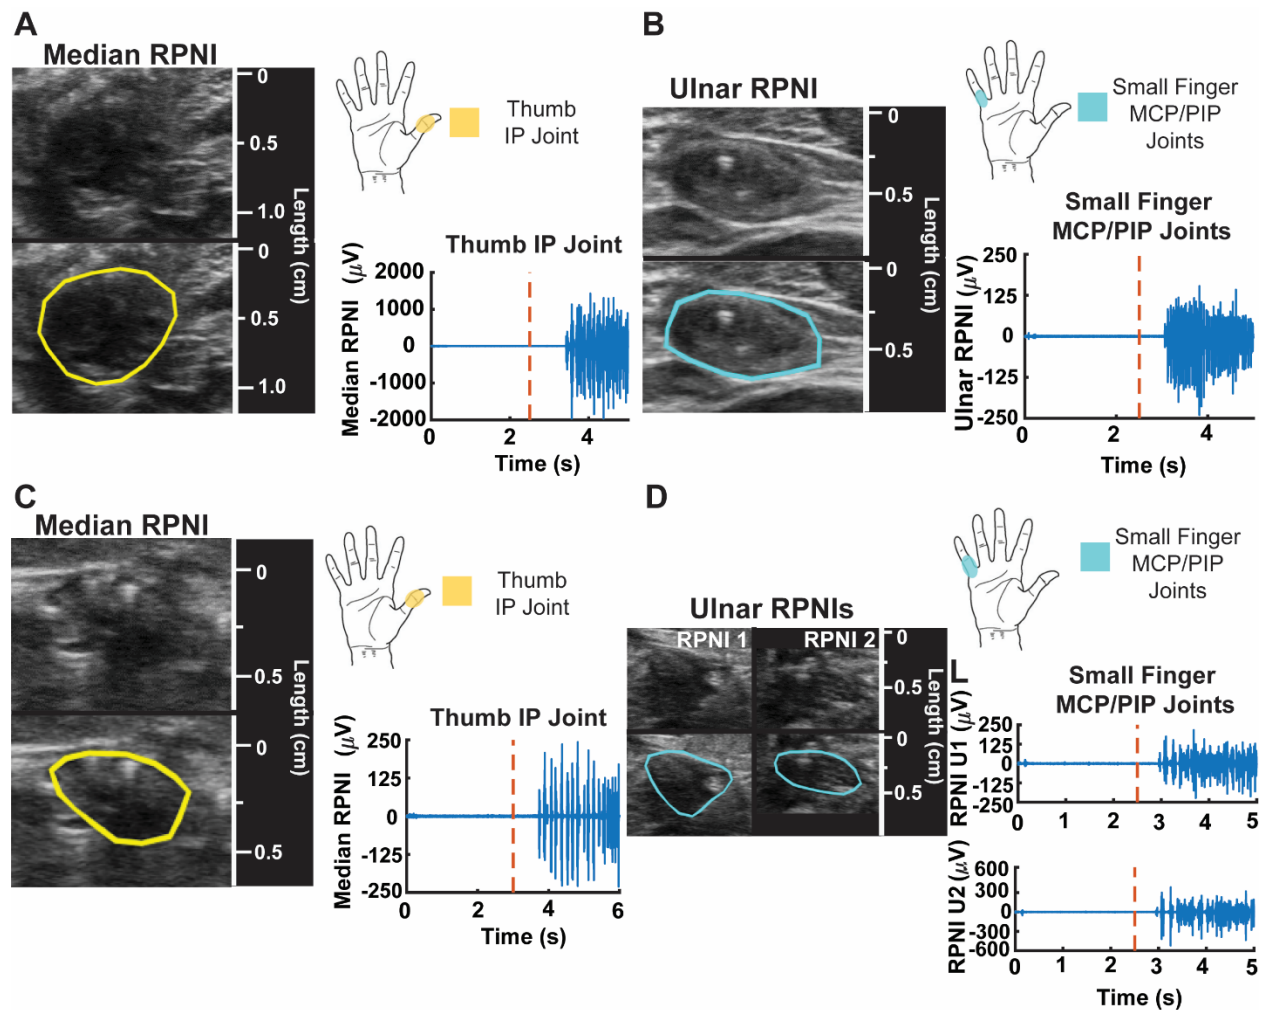

**Fig. S2. P3 and P4's RPNI sonograms, motor map, and electrophysiology.** (A) P3's median RPNI sonogram captured 31 months post-RPNI surgery, and a sample of EMG signals recorded after cued thumb movement (red dashed line). (B) P3's ulnar RPNI sonogram captured 31 months post-RPNI surgery and a sample of ulnar RPNI EMG signals (blue) recorded after cued small finger movement (red dashed line). (C) P4's median RPNI sonogram captured 16 months post-RPNI surgery and 4 months post-indwelling electrode surgery. EMG signals (blue) were recorded after cued thumb movement (red dashed line) in the median RPNI. (D) P4's sonograms of ulnar RPNI 1 and 2 captured 16 months post-RPNI surgery and 4 months post-indwelling electrode surgery. EMG signals (blue) were recorded after cued small finger movement (red dashed line) in the ulnar RPNI (RPNI U1, RPNI U2), respectively.

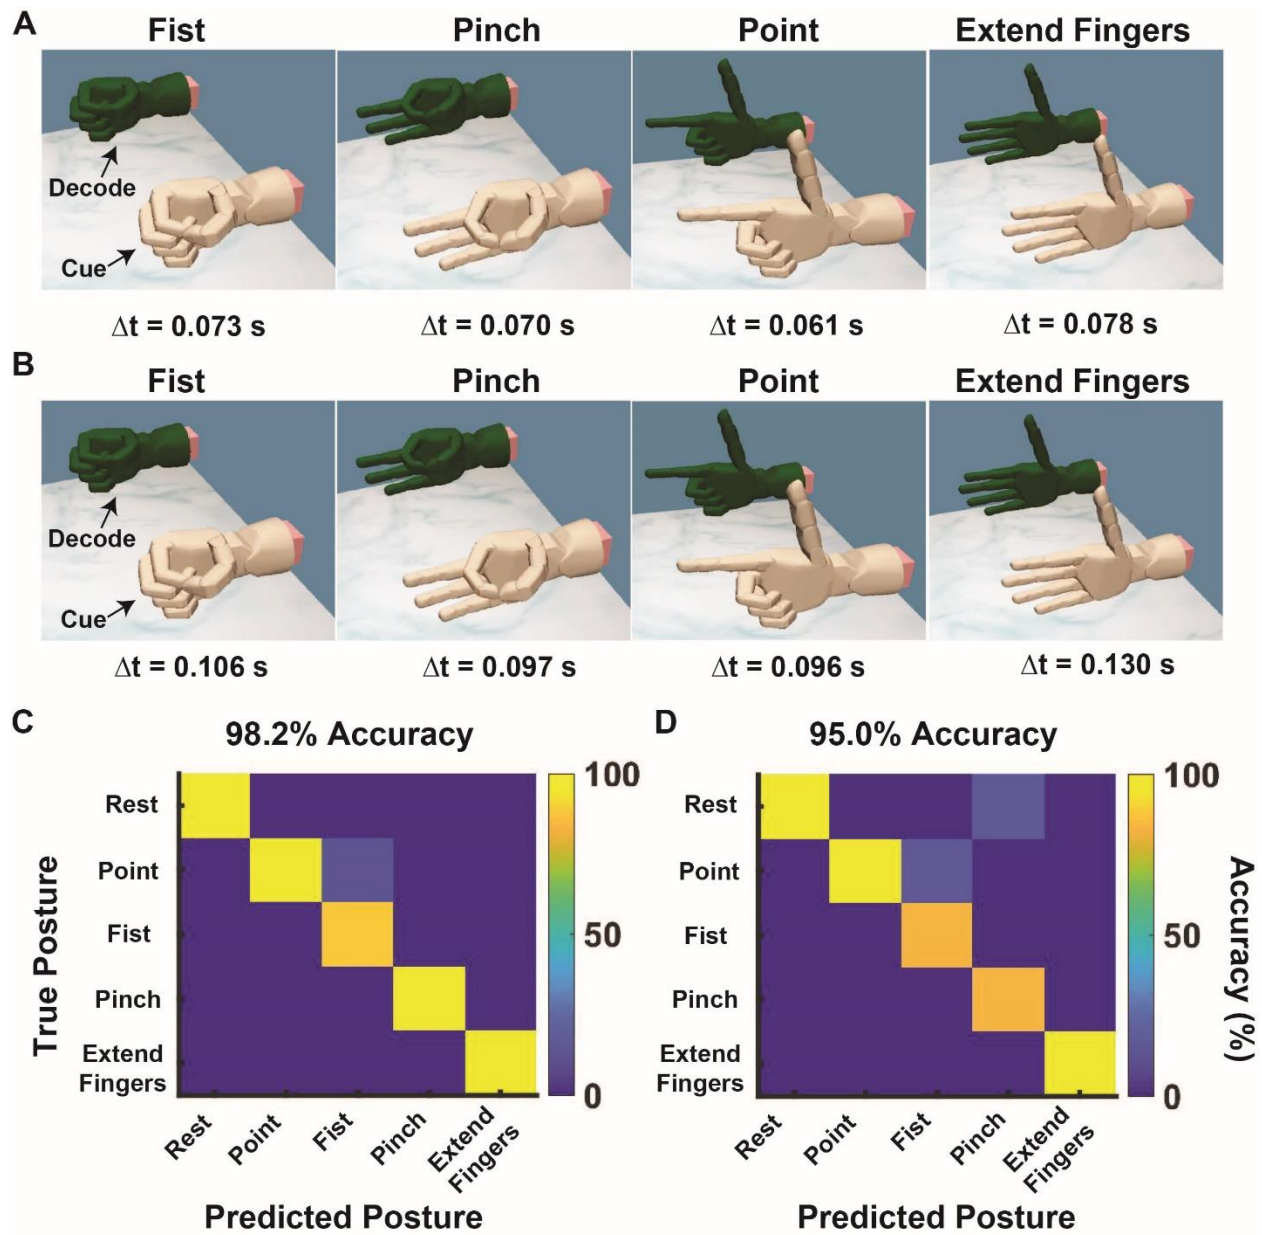

**Fig. S3. Real-time classification of grasping hand postures.** (A), (B) P3 and P4's discrete control of fist, pinch, point, and extended fingers during a posture mirroring task. The fastest recorded motion selection times are shown for each posture. (C), (D) Offline confusion matrix of the postures used in (A) and (B), respectively. The y-axis represents the true posture, while the x-axis represents the predicted posture. The color map indicates the accuracy (%) of the classifier's prediction.

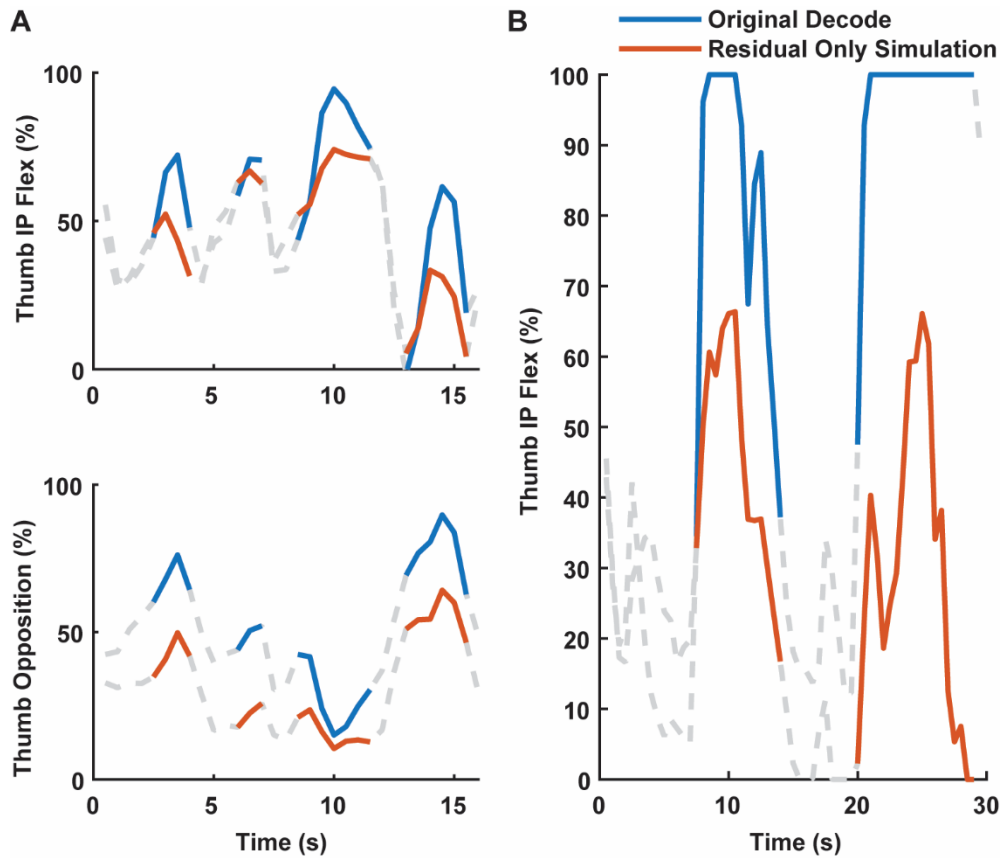

**Fig. S4. Original and simulated decodes during functional tasks.** (A) P3's decoded 2 degree of freedom thumb during the box and blocks task. Solid lines represent periods of active thumb movement on the LUKE arm. The solid blue lines represent original real-time predictions using RPNI and residual extensor muscle EMG. The solid orange lines represent simulated predictions using only residual muscle EMG. (B) P4's decoded and simulated thumb flexion during the SHAP abstract object tasks. Solid lines represent periods of active thumb movement on the i-limb.

**Table S1. Details of a subset of muscles missing in each participant and their function.**

| Participant | Level of Amputation      | Missing Muscles                | Nerve                       | Function                                                                            |
|-------------|--------------------------|--------------------------------|-----------------------------|-------------------------------------------------------------------------------------|
| P1*         | Proximal transradial     | Flexor Digitorum Superficialis | Median                      | Flex digits 2-5 at MCP/PIP joints                                                   |
|             |                          | Flexor Digitorum Profundus     | Median and Ulnar            | Median half: Flex digits 2-3 at DIP joint, Ulnar half: Flex digits 4-5 at DIP joint |
|             |                          | Flexor Pollicis Longus         | Median                      | Flex digit 1 at IP joint                                                            |
| P2**        | Shoulder disarticulation | Biceps Brachii                 | Musculocutaneous            | Flex elbow joint, supinates the forearm                                             |
|             |                          | Triceps Brachii                | Radial and axillary         | Extends forearm, adducts arm                                                        |
|             |                          | Brachialis                     | Musculocutaneous and radial | Flex elbow joint                                                                    |
|             |                          | Coracobrachialis               | Musculocutaneous            | Adducts humerus, flex the arm at glenohumeral joint                                 |
| P3, P4      | Wrist disarticulation    | Abductor Pollicis Brevis       | Median                      | Abduct digit 1 – assists to oppose and extend digit 1                               |
|             |                          | Flexor Pollicis Brevis         | Median and Ulnar            | Flex digit 1 at MCP/CMC joints – assists to oppose digit 1                          |
|             |                          | Opponens Pollicis              | Median                      | Flex digit 1 at CMC joint – assists to oppose digit 1                               |
|             |                          | Lumbricals 1 and 2             | Median                      | Simultaneously flex digit 2 and 3 at MCP joint and extend 2 or 3 at PIP joint       |
|             |                          | Flexor Digiti Minimi Brevis    | Ulnar                       | Flex digit 5 at MCP joint                                                           |
|             |                          | Opponens Digiti Minimi         | Ulnar                       | Oppose digit 5 – flex/rotate 5 <sup>th</sup> metacarpal                             |
|             |                          | Lumbricals 3 and 4             | Ulnar                       | Simultaneously flex digit 4 or 5 at MCP joint and extend digit 4 or 5 at PIP joint  |

MCP – metacarpophalangeal joint, PIP – proximal interphalangeal joint, DIP – distal interphalangeal joint, IP – interphalangeal joint, CMC – Carpometacarpal joint

\*P1 is also missing all the muscles missing in P3 and P4.

\*\*P2 is also missing all the muscles missing in P1, P3, and P4.

**Table S2. Quantitative analysis of ultrasound videos for P1.**

| Participant | Finger movement              |                    | Pixel mean intensity change (%) | Pixel standard deviation change (%) | Compared against surrounding tissue<br>Mean intensity p – value,<br>Standard deviation p – value |
|-------------|------------------------------|--------------------|---------------------------------|-------------------------------------|--------------------------------------------------------------------------------------------------|
| P1          | Thumb MCP/IP flexion         | Surrounding Tissue | 1.20                            | 0.28                                | N/A                                                                                              |
|             |                              | Median RPNI 1      | 8.34                            | 10.80                               | p < .001, .001                                                                                   |
|             |                              | Median RPNI 2      | 2.33                            | 0.61                                | p < .001, = .005                                                                                 |
|             |                              | Median RPNI 3      | 5.91                            | 0.81                                | p = .03, < .001                                                                                  |
|             |                              | Median RPNI 4      | 1.45                            | 0.20                                | p = .74, .02                                                                                     |
|             |                              | Surrounding Tissue | 1.23                            | 0.52                                | N/A                                                                                              |
|             |                              | Ulnar RPNI 1       | 6.08                            | 11.6                                | p = .47, < .001                                                                                  |
|             |                              | Surrounding Tissue | 0.33                            | 0.11                                | N/A                                                                                              |
|             |                              | Ulnar RPNI 2       | 1.11                            | 0.16                                | p < .001, .001                                                                                   |
|             | Index finger PIP/DIP flexion | Surrounding Tissue | 0.18                            | 0.25                                | N/A                                                                                              |
|             |                              | Median RPNI 1      | 4.49                            | 6.74                                | p < .001, .002                                                                                   |
|             |                              | Median RPNI 2      | 0.60                            | 3.07                                | p = .52, < .001                                                                                  |
|             |                              | Median RPNI 3      | 7.90                            | 11.8                                | p = .005, < .001                                                                                 |
|             |                              | Median RPNI 4      | 0.16                            | 4.63                                | p = .18, .01                                                                                     |
|             |                              | Surrounding Tissue | 0.28                            | 0.09                                | N/A                                                                                              |
|             |                              | Ulnar RPNI 1       | 3.02                            | 3.22                                | p = .06, .01                                                                                     |
|             |                              | Surrounding Tissue | 0.08                            | 0.62                                | N/A                                                                                              |
|             |                              | Ulnar RPNI 2       | 4.59                            | 7.28                                | p < .001, .001                                                                                   |

CMC – Carpometacarpal joint, MCP – metacarpophalangeal joint, PIP – proximal interphalangeal joint, DIP – distal interphalangeal joint, IP – interphalangeal joint



**Table S2. Quantitative analysis of ultrasound videos for P1. (continued)**

| Participant | Finger movement              |                    | Pixel mean intensity change (%) | Pixel standard deviation change (%) | Compared against surrounding tissue<br>Mean intensity p – value,<br>Standard deviation p – value |
|-------------|------------------------------|--------------------|---------------------------------|-------------------------------------|--------------------------------------------------------------------------------------------------|
| P1          | Small finger PIP/DIP flexion | Surrounding Tissue | 0.02                            | 0.24                                | N/A                                                                                              |
|             |                              | Median RPNI 1      | 2.01                            | 1.02                                | p = .008, .48                                                                                    |
|             |                              | Median RPNI 2      | 1.41                            | 2.20                                | p = .005, < .001                                                                                 |
|             |                              | Median RPNI 3      | 0.64                            | 0.19                                | p = .009, .005                                                                                   |
|             |                              | Median RPNI 4      | 0.57                            | 2.03                                | p = .50, .01                                                                                     |
|             |                              | Surrounding Tissue | 0.86                            | 0.33                                | N/A                                                                                              |
|             |                              | Ulnar RPNI 1       | 12.8                            | 11.2                                | p < .001, .001                                                                                   |
|             |                              | Surrounding Tissue | 0.67                            | 0.16                                | N/A                                                                                              |
|             |                              | Ulnar RPNI 2       | 1.24                            | 2.37                                | p < .001, .001                                                                                   |

CMC – Carpometacarpal joint, MCP – metacarpophalangeal joint, PIP – proximal interphalangeal joint, DIP – distal interphalangeal joint, IP – interphalangeal joint

**Table S3. Calculated movement selection times for several postures between P3 and P4.**

| <b>Participant</b> | <b>Posture</b>  | <b>Movement Selection Time (s), Mean <math>\pm</math> SD (n = 5 trials)</b> | <b>Overall Mean Across Postures, Mean <math>\pm</math> SD (s)</b> |
|--------------------|-----------------|-----------------------------------------------------------------------------|-------------------------------------------------------------------|
| P3                 | Thumb MCP Joint | 0.124 $\pm$ 0.00110                                                         | 0.172 $\pm$ 0.105                                                 |
|                    | Thumb IP Joint  | 0.306 $\pm$ 0.0251                                                          |                                                                   |
|                    | Small Finger    | 0.275 $\pm$ 0.0476                                                          |                                                                   |
|                    | Hand Adduction  | 0.346 $\pm$ 0.0596                                                          |                                                                   |
|                    | Fist            | 0.106 $\pm$ 0.0292                                                          |                                                                   |
|                    | Pinch           | 0.0942 $\pm$ 0.0263                                                         |                                                                   |
|                    | Point           | 0.0862 $\pm$ 0.0215                                                         |                                                                   |
|                    | Extend Fingers  | 0.0985 $\pm$ 0.0163                                                         |                                                                   |
|                    | Rest            | 0.108 $\pm$ 0.00167                                                         |                                                                   |
| P4                 | Ring Finger     | 0.285 $\pm$ 0.186                                                           | 0.234 $\pm$ 0.0894                                                |
|                    | Thumb IP Joint  | 0.120 $\pm$ 0.0554                                                          |                                                                   |
|                    | Small Finger    | 0.359 $\pm$ 0.219                                                           |                                                                   |
|                    | Hand Abduction  | 0.365 $\pm$ 0.178                                                           |                                                                   |
|                    | Fist            | 0.236 $\pm$ 0.151                                                           |                                                                   |
|                    | Pinch           | 0.229 $\pm$ 0.113                                                           |                                                                   |
|                    | Point           | 0.193 $\pm$ 0.0906                                                          |                                                                   |
|                    | Extend Fingers  | 0.192 $\pm$ 0.0562                                                          |                                                                   |
|                    | Rest            | 0.124 $\pm$ 0.018                                                           |                                                                   |

**Table S4. Summary of observed RPNI grafts and the electrode type used to record EMG.**

| <b>Participant</b> | <b>RPNI name</b> | <b>Nerve</b> | <b>Electrode type</b> |
|--------------------|------------------|--------------|-----------------------|
| P1                 | Median RPNI 1    | Median       | Fine wire             |
|                    | Median RPNI 2    | Median       | none                  |
|                    | Median RPNI 3    | Median       | none                  |
|                    | Median RPNI 4    | Median       | none                  |
|                    | Ulnar RPNI 1     | Ulnar        | Fine wire             |
|                    | Ulnar RPNI 2     | Ulnar        | Fine wire             |
| P2                 | RPNI 1           | Unknown      | none                  |
|                    | RPNI 2           | Unknown      | none                  |
| P3                 | Median RPNI      | Median       | Intramuscular         |
|                    | Ulnar RPNI       | Ulnar        | Intramuscular         |
| P4                 | Median RPNI      | Median       | Intramuscular         |
|                    | Ulnar RPNI 1     | Ulnar        | Intramuscular         |
|                    | Ulnar RPNI 2     | Ulnar        | Intramuscular         |

**Movie S1. Ultrasound video capturing P1's median RPNI's.**

Ultrasound video capturing P1's median RPNI's during volitional thumb flexion, index finger flexion, and small finger flexion.

**Movie S2. Ultrasound video capturing P1's ulnar RPNI's.**

Ultrasound video capturing P1's ulnar RPNI's during volitional thumb flexion, index finger flexion, and small finger flexion.

**Movie S3. Ultrasound video capturing two RPNI's from P2.**

Ultrasound video capturing two of P2's RPNI's during volitional thumb flexion, index finger flexion, and middle, ring, small finger flexion.

**Movie S4. P3's real-time discrete control of finger postures.**

P3's real-time discrete control of a virtual and physical prosthesis (DEKA LUKE arm) using a classifier algorithm. The classifier predicted between thumb MCP joint, thumb IP joint, small finger, adduction, and rest using only RPNI signals.

**Movie S5. P4's real-time discrete control of finger postures.**

P4's real-time discrete control of a virtual and physical prosthesis (DEKA LUKE arm) using a classifier algorithm. The classifier predicted between ring finger, thumb IP joint, small finger, abduction, and rest using only RPNI signals.

**Movie S6. P3 and P4's real-time discrete control of grasping postures.**

P3 and P4's real-time discrete control of a virtual using a classifier algorithm. The classifier predicted between fist, pinch, point, and extend fingers using RPNI and residual muscle signals.

**Movie S7. P3's real-time continuous one DOF control up to 300 days.**

P3's real-time continuous control of the one degree of freedom thumb IP joint using a regression-based algorithm. The video demonstrates motor performance over time without recalibration of the algorithm, from day 0 up to day 300.

**Movie S8. P4's real-time continuous one DOF control up to 97 days.**

P4's real-time continuous control of the one degree of freedom thumb IP joint using a regression-based algorithm. The video demonstrates motor performance over time without recalibration of the algorithm, from day 0 up to day 97.

**Movie S9. P3 and P4's real-time continuous two DOF thumb control.**

P3 and P4's real-time continuous control of the two degree of freedom thumb MCP/CMC/IP joints.

**Movie S10. P4's real-time continuous two DOF thumb control using surface EMG.**

P4's real-time continuous control of the two degree of freedom thumb MCP/CMC/IP joints using surface EMG.

**Movie S11. P3's real-time continuous two DOF thumb using the LUKE arm.**

P3's control of the two degree freedom thumb using the physical prosthesis (DEKA LUKE arm). Similar to the virtual target task, P3 had to hit a wand in various positions. Additionally, P3 was asked to mirror movements of an intact thumb with his prosthetic thumb.

**Movie S12. P3 and P4's real-time continuous control during functional tasks.**

In the first segment, P3 uses a three degree of freedom continuous controller (two degree of freedom thumb + index) to control a physical prosthesis (DEKA LUKE arm). P3 then performs a self-paced box and blocks task. In the second segment, P4 uses a physical prosthesis (Össur i-limb Quantum) to sequentially complete three SHAP abstract object tasks. A two degree of freedom continuous controller provided P4 the ability to control key pinch and power grip to complete the task.
